# Supplementary material for: Remote ischemic conditioning improves myocardial parameters and clinical outcomes during primary percutaneous coronary intervention: a meta-analysis of randomized controlled trials
Source: PubMed Central journal article supplement (PMC5823569; doi:10.18632/oncotarget.23818), 2017-12-22
Supplement: oncotarget-09-8653-s001.pdf [file oncotarget-09-8653-s001.pdf]

# **Remote ischemic conditioning improves myocardial parameters and clinical outcomes during primary percutaneous coronary intervention : A meta-analysis of randomized controlled trials**

## **SUPPLEMENTARY MATERIALS**

**Supplementary Table 1: Study design in all included randomized trials.** See Supplementary\_Table 1
